# Supplementary material for: Structure and chemistry of the solid electrolyte interphase (SEI) on a high capacity conversion-based anode: NiO
Source: Royal Society of Chemistry journal article supplement (doi:10.1039/d0ta09683k), 2020-12-16
Supplement: d0ta09683k1.pdf [file d0ta09683k1.pdf]

## Supplementary Material

### Structure and Chemistry of the Solid Electrolyte Interphase (SEI) on a High Capacity Conversion-based Anode: NiO

Benjamin Ng<sup>a</sup>, Ehsan Faegh<sup>a</sup>, Saheed Lateef<sup>a</sup>, Stavros G. Karakalos<sup>a</sup>, and William E. Mustain<sup>a\*</sup>

<sup>a</sup>Department of Chemical Engineering, University of South Carolina, Columbia, SC 29208, United States

\*Corresponding author: William Mustain: [mustainw@mailbox.sc.edu](mailto:mustainw@mailbox.sc.edu)

**Keywords:** SEI; Tafel; Marcus-Hush-Chidsey; Lithium-ion battery; anode; metal oxide

**Table S-1.** Hypothetical generalized mechanism where  $n$  is the total number of  $e^-$ ,  $\gamma$  is the number of  $e^-$  before RDS,  $\gamma$  is the number of  $e^-$  after RDS, and  $\rho$  is either 0 (chemical) or 1 (electrochemical) <sup>1,2</sup>

| Generalized Reaction for            | # of electrons                 |
|-------------------------------------|--------------------------------|
| $A + ne^- \rightleftharpoons z$     |                                |
| $A + e^- \rightleftharpoons B$      | 1                              |
| $B + e^- \rightleftharpoons C$      | 2                              |
| ↓    ...    ↓                       | ↓                              |
| $M + e^- \rightleftharpoons N$      | $\gamma$                       |
| $N + \rho e^- \rightleftharpoons O$ | $\gamma + \rho \leftarrow$ RDS |
| $O + e^- \rightleftharpoons P$      | $\gamma$                       |
| ↓    ...    ↓                       | ↓                              |
| $X + e^- \rightleftharpoons Y$      | n-1                            |
| $Y + e^- \rightleftharpoons Z$      | n                              |

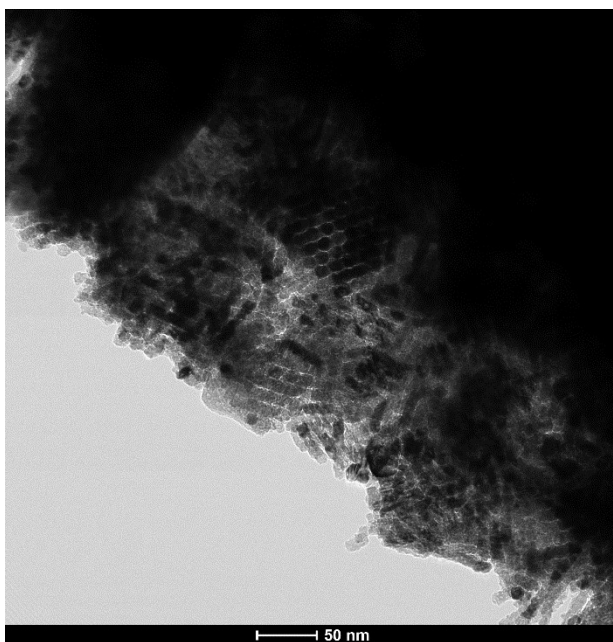

**Figure S-1.** Transmission electron microscopy of pre-cycled surface mesostructure of NiO

## References

1. Fletcher, S. Tafel slopes from first principles. *J. Solid State Electrochem.* **13**, 537–549 (2009).
2. Bockris, J. O. M. & Nagy, Z. Symmetry factor and transfer coefficient: A source of confusion in electrode kinetics. *J. Chem. Educ.* **50**, 839–843 (1973).
